# Supplementary material for: A self-assembled bisoxazoline/Pd composite microsphere as an excellent catalyst for Suzuki–Miyaura coupling reactions
Source: Royal Society of Chemistry journal article supplement (doi:10.1039/c5gc01551k), 2015-10-07
Supplement: c5gc01551k1.pdf [file c5gc01551k1.pdf]

## Electronic Supplementary Information

### A self-assembled bisoxazoline/Pd composite microsphere as an excellent catalyst for Suzuki-Miyaura coupling reaction

Junke Wang<sup>a,b,c</sup>, Yingxiao Zong<sup>a,b</sup>, Xicun Wang<sup>\*,b</sup>, Yulai Hu<sup>b</sup>, Guoren Yue<sup>a</sup> and Yi Pan<sup>c</sup>

---

<sup>a</sup> Key Laboratory of Hexi corridor resources utilization of Gansu Universities, College of Chemistry and Chemical Engineering, Hexi University, Zhangye 734000, China

<sup>b</sup> Gansu Key Laboratory of Polymer Materials, College of Chemistry and Chemical Engineering, Northwest Normal University, Lanzhou 730070, China

<sup>c</sup> College of Chemistry and Chemical Engineering, Nanjing University, Nanjing 210093, China

## Table of Contents

|                                                                             |          |
|-----------------------------------------------------------------------------|----------|
| <b>1. Materials and methods .....</b>                                       | <b>2</b> |
| <b>2. Optimization of the catalytic conditions .....</b>                    | <b>3</b> |
| <b>3. Preparation and analytical data of catalyst C .....</b>               | <b>4</b> |
| <b>4. General Experimental Procedures for Suzuki-Miyaura Couplings.....</b> | <b>5</b> |
| <b>5. NMR spectra of the materials and products.....</b>                    | <b>8</b> |

### 1. Materials and methods

Melting points were determined on a Perkin-Elmer differential scanning calorimeter and were uncorrected. The IR spectra were run on a Nicolette spectrometer (KBr). NMR spectra were recorded at 400 ( $^1\text{H}$ ) and 100 ( $^{13}\text{C}$ ) MHz, respectively, on a Varian Mercury plus-400 instrument using  $\text{CDCl}_3$  as solvent and TMS as the internal standard. Scanning electron microscopy (SEM) was performed on a FEI Quanta 450 FEG FESEM instrument. High resolution mass spectra (HRMS) were obtained on an Agilent LC-MSD-Trap-XCT spectrometer with micromass MS software using electrospray ionisation (ESI). All the solvents used were strictly dried according to standard operation and stored on 4 Å molecular sieves. Flash chromatography columns were packed with 200-300 mesh silica gel.

All other chemicals (AR grade) were commercially available and used without further purification.

## 2.Optimization of the catalytic conditions

**Table 1** The effect of solvents and bases<sup>a</sup>

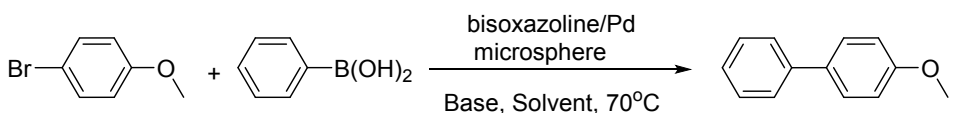

| Entry | Solvent                         | Base                            | Time( h) | Yield(%) <sup>b</sup> |
|-------|---------------------------------|---------------------------------|----------|-----------------------|
| 1     | H <sub>2</sub> O                | Na <sub>2</sub> CO <sub>3</sub> | 2        | 15                    |
| 2     | H <sub>2</sub> O                | K <sub>2</sub> CO <sub>3</sub>  | 2        | 29                    |
| 3     | H <sub>2</sub> O                | NaHCO <sub>3</sub>              | 2        | 10                    |
| 4     | H <sub>2</sub> O                | NaOAc                           | 2        | 18                    |
| 5     | H <sub>2</sub> O                | TEA                             | 2        | 8                     |
| 6     | H <sub>2</sub> O:EtOH (2:1)     | K <sub>2</sub> CO <sub>3</sub>  | 2        | 41                    |
| 7     | H <sub>2</sub> O:EtOH (1:1)     | K <sub>2</sub> CO <sub>3</sub>  | 2        | 50                    |
| 8     | H <sub>2</sub> O:EtOH (1:2)     | K <sub>2</sub> CO <sub>3</sub>  | 2        | 65                    |
| 9     | EtOH                            | K <sub>2</sub> CO <sub>3</sub>  | 2        | 20                    |
| 10    | Toluene                         | K <sub>2</sub> CO <sub>3</sub>  | 2        | 28                    |
| 11    | DMF                             | K <sub>2</sub> CO <sub>3</sub>  | 2        | 5                     |
| 12    | dioxane                         | K <sub>2</sub> CO <sub>3</sub>  | 2        | 7                     |
| 13    | H <sub>2</sub> O:PEG-400 (5:1)  | K <sub>2</sub> CO <sub>3</sub>  | 2        | 85                    |
| 14    | H <sub>2</sub> O:PEG-400 (8:1)  | K <sub>2</sub> CO <sub>3</sub>  | 2        | 84                    |
| 15    | H <sub>2</sub> O:PEG-400 (10:1) | K <sub>2</sub> CO <sub>3</sub>  | 2        | 84                    |
| 16    | H <sub>2</sub> O:PEG-400 (10:1) | K <sub>2</sub> CO <sub>3</sub>  | 3        | 93                    |
| 17    | H <sub>2</sub> O:PEG-400 (10:1) | K <sub>2</sub> CO <sub>3</sub>  | 4        | 98                    |

<sup>a</sup> Reaction conditions: bisoxazoline/Pd microspheres containing 0.1mol% Pd, 1 mmol of *p*-bromoanisole, 1 mmol of phenylboronic acid, 2 mmol of base, 5 ml of solvent, 70 °C in air.

<sup>b</sup> Isolated yield.

### 3. Preparation and analytical data of catalyst C

#### Synthesis of bisacylthiourea B

To a solution of 4,4'-Oxybisbenzoyl chloride **A** (2 mmol) in CH<sub>2</sub>Cl<sub>2</sub> (10 mL) was added ammonium thiocyanate (2.6 mmol) and PEG-400 (0.2 mmol). The mixture was then stirred at room temperature for 60 min and cooled to 0°C, and the solution of 2-aminoethanol (1.8 mmol) in CH<sub>2</sub>Cl<sub>2</sub> (2 mL) was added. The mixture was continuously stirred for 60 min. After the completion of the reaction, the solvent was removed by distillation, and water (10 mL) was added to obtain a white solid. The analytical sample was produced by flash chromatography (acetone and petroleum ether) to give a white solid **B**. Yield: 85%. Spectral data: IR (KBr) (cm<sup>-1</sup>):  $\nu$  3337, 3225, 2944, 1670, 1531. <sup>1</sup>H NMR (400 MHz, DMSO)  $\delta$  11.35 (s, 2H), 11.05 (s, 2H), 8.02 (d,  $J$  = 8.8 Hz, 4H), 7.17 (d,  $J$  = 8.8 Hz, 4H), 4.98 (s, 2H), 3.83-3.44 (m, 8H). <sup>13</sup>C NMR (100 MHz, DMSO)  $\delta$  180.71 (s), 167.65 (s), 159.87 (s), 131.68 (s), 128.22 (s), 118.95 (s), 58.75 (s), 47.97 (s), 40.38 (s), 40.17 (s), 39.96 (s), 39.75 (s), 39.54 (s). HR-MS:  $m/z$  calcd for C<sub>20</sub>H<sub>21</sub>N<sub>2</sub>O<sub>5</sub>S<sub>2</sub> [M+H]<sup>+</sup>: 433.0892; found: 433.0889.

#### Synthesis of bisoxazoline C

To a solution of compound **B** (1 mmol) in DMF (5 mL) was added dicyclohexylcarbodiimide (DCC) (1 mmol) and TEA (1 mmol). The mixture was stirred for 2 h at 80°C, and cooled to room temperature. After the addition of water (5 mL), the white solid was obtained by the filtration. This solid was added into CH<sub>3</sub>CN (5 mL) to be dissolved, followed by the filtration and concentration to afford the target compound **C**. Yield: 98%. Spectral data: IR (KBr) (cm<sup>-1</sup>):  $\nu$  3310, 2921, 1638, 1548. <sup>1</sup>H NMR (400 MHz, DMSO)  $\delta$  9.61 (s, 2H), 8.28 – 7.99 (m, 4H), 7.20 – 6.98 (m, 4H), 4.47 (t,  $J$  = 8.6 Hz, 4H), 3.78 (t,  $J$  = 8.6 Hz, 4H). <sup>13</sup>C NMR (100 MHz, DMSO)  $\delta$  180.71, 167.65, 159.87, 131.68, 128.22, 118.95, 58.75, 47.97, 40.59, 40.38, 40.17, 39.96, 39.75, 39.54, 39.33. HR-MS:  $m/z$  calcd for C<sub>20</sub>H<sub>19</sub>N<sub>4</sub>O<sub>5</sub> [M+H]<sup>+</sup>: 395.1355; found: 395.1395.

#### Synthesis of catalyst D

To the solution of Pd(AcO)<sub>2</sub> (2 mmol) in CH<sub>3</sub>CN (5 mL) was added dropwise into the obtained compound **C** (1.36 g, 6 mmol) in CH<sub>3</sub>CN (2 mL), followed by the stirring for 10 h. On completion, the filtration was conducted to a yellow solid. Washing with commercial anhydrous CH<sub>3</sub>CN (3 × 5 mL) and drying at 50 °C overnight gave bisoxazoline/Pd microsphere as a pale yellow powder (compound **D**). IR (KBr) (cm<sup>-1</sup>):  $\nu$  3443, 2907, 1592. The Pd content of the bisoxazoline/Pd microsphere catalyst is 20.01 wt% (1.8 mmol/g) measured by atomic absorption spectroscopy (AAS).

### 4. General Experimental Procedures for Suzuki-Miyaura Couplings

In a typical experiment, the bisoxazoline/Pd microsphere catalyst (0.005 mmol of Pd) was added to a mixture of aryl halide (1.2 mmol), arylboronic acid (1.0 mmol), PEG-400 (0.1 mmol) and K<sub>2</sub>CO<sub>3</sub> (2.0 mmol) in water (5.0 mL), and the reaction mixture was stirred at reflux. After the reaction was monitored to be complete by TLC analysis, the catalyst was removed by filtration, washed with ethanol (3 × 3 mL), and dried under vacuum for the next run. The organic fractions were then concentrated on a rotary evaporator to afford the desired biaryl in excellent yield. The crude products were further purified by recrystallization.

## 5. NMR spectra of the materials and products

### <sup>1</sup>H NMR of bisacylthiourea B

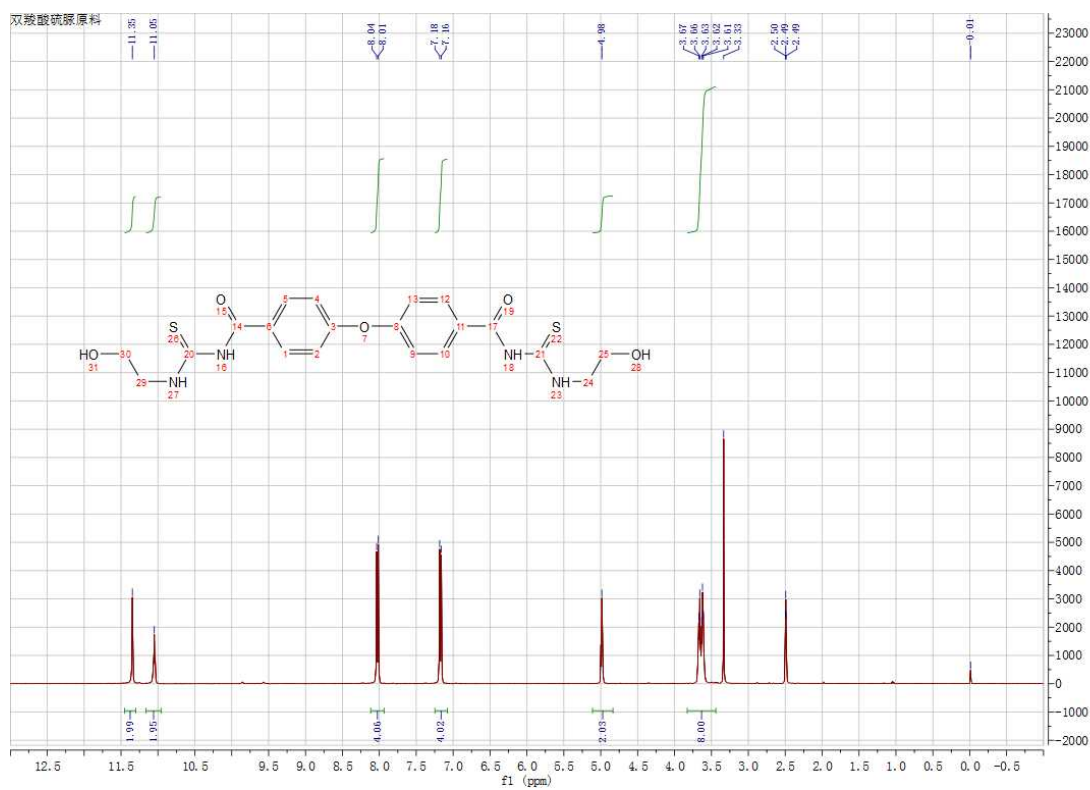

### <sup>13</sup>C NMR of bisacylthiourea B

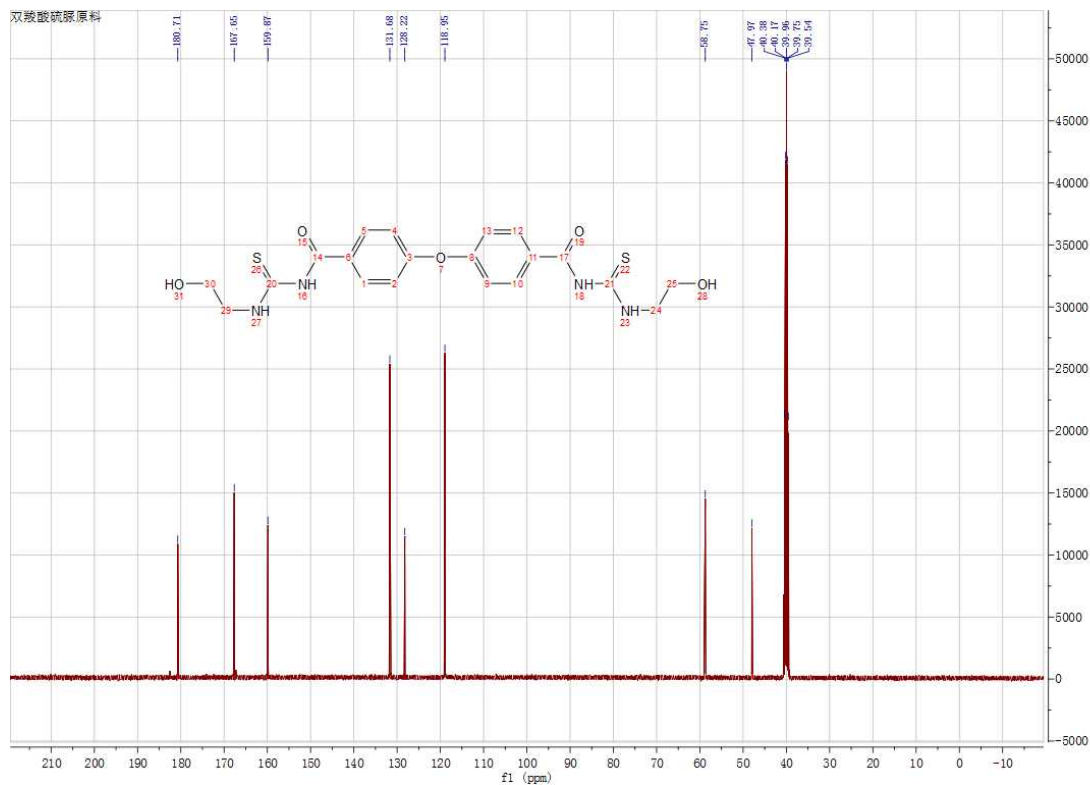

### <sup>1</sup>H NMR of bisoxazoline C

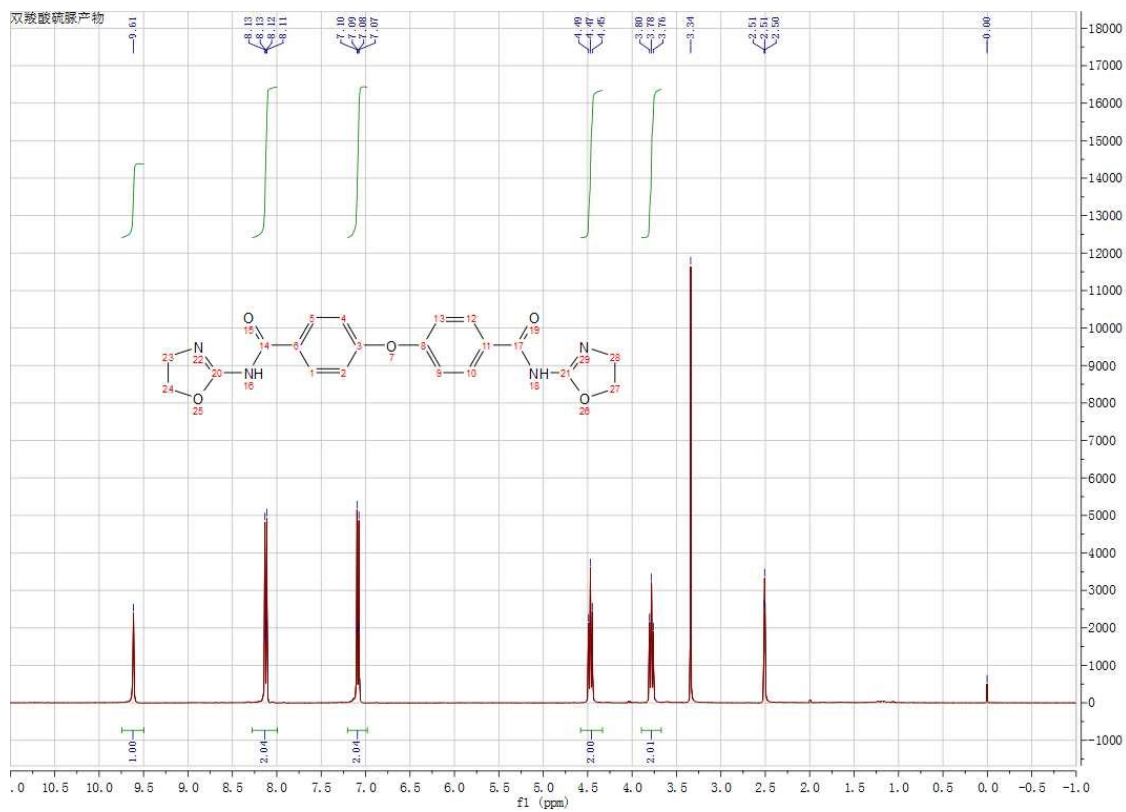

### <sup>13</sup>C NMR of bisoxazoline C

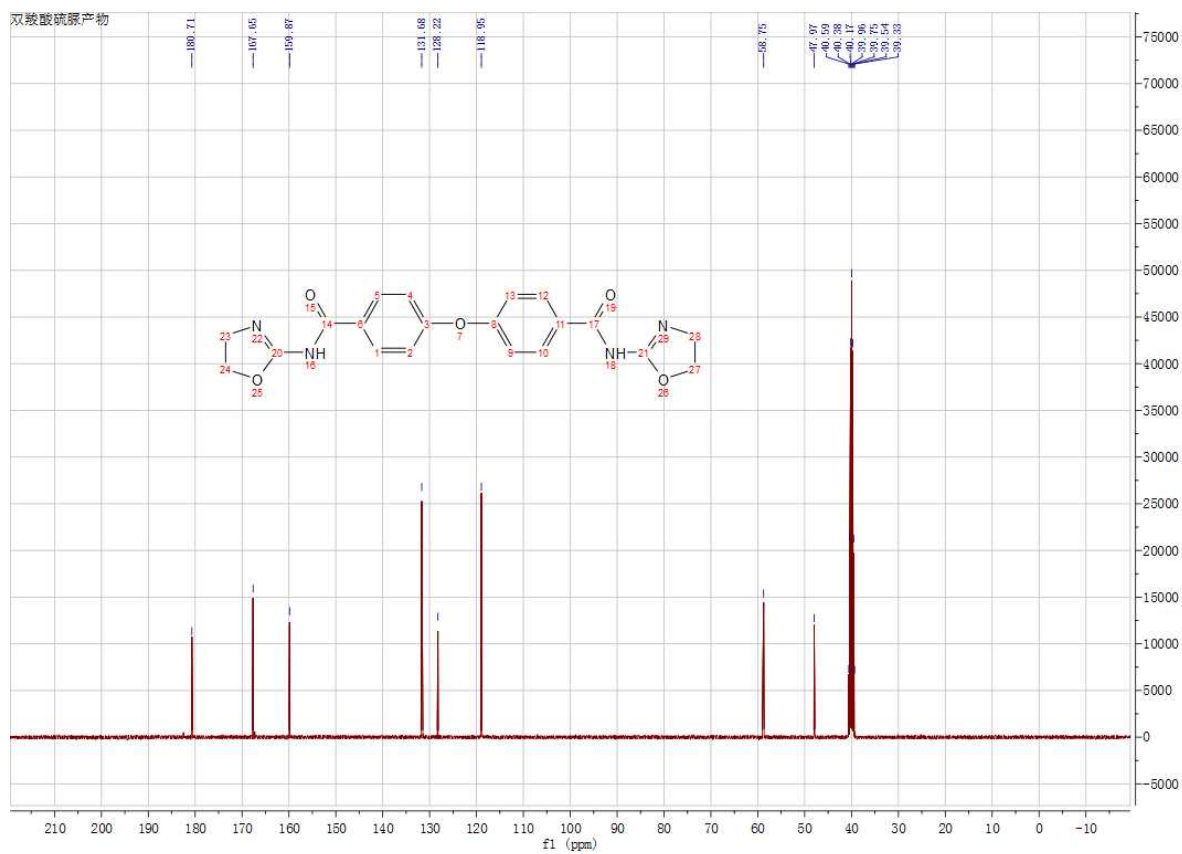

1. <sup>1</sup>H NMR (400 MHz, CDCl<sub>3</sub>)  $\delta$  7.65 – 7.54 (m, 2H), 7.45 (ddd, *J* = 7.8, 4.5, 1.2 Hz, 2H), 7.36 (dt, *J* = 9.3, 4.3 Hz, 1H).

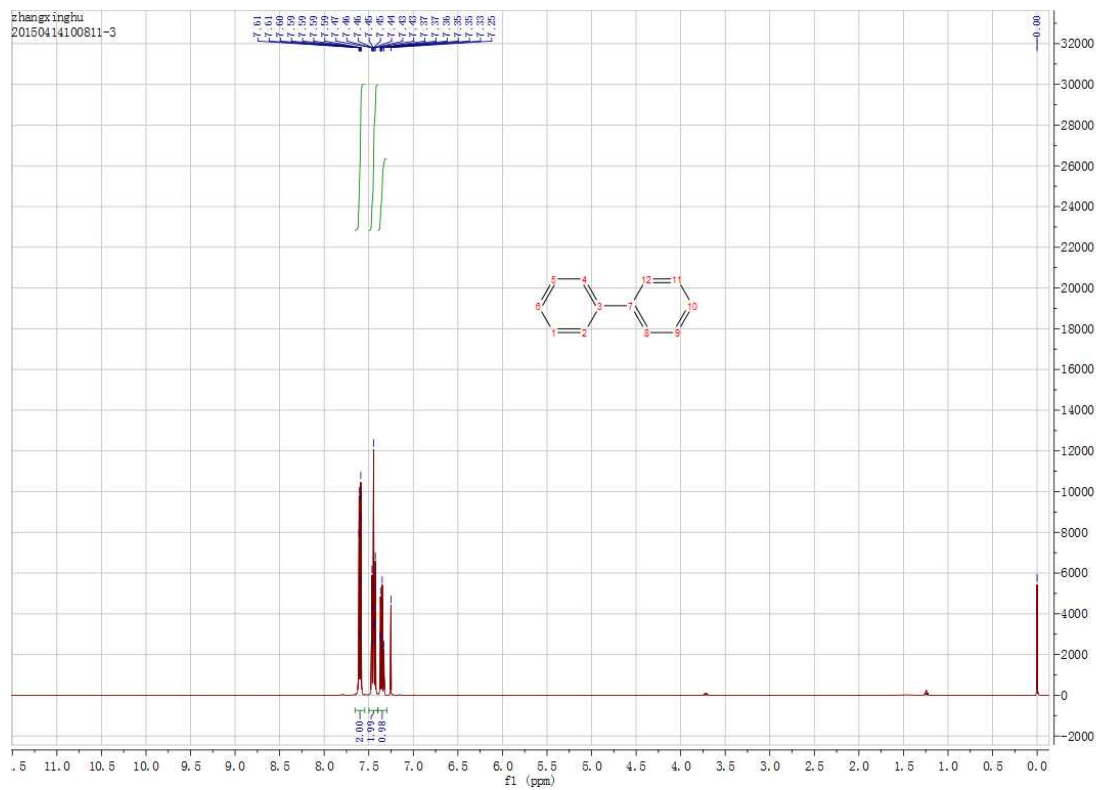

2.  $^1\text{H NMR}$  (400 MHz,  $\text{CDCl}_3$ )  $\delta$  7.53 – 7.44 (m, 3H), 7.38 (d,  $J = 8.7$  Hz, 1H), 6.97 (dd,  $J = 8.8, 6.5$  Hz, 2H), 3.85 (d,  $J = 3.0$  Hz, 3H).

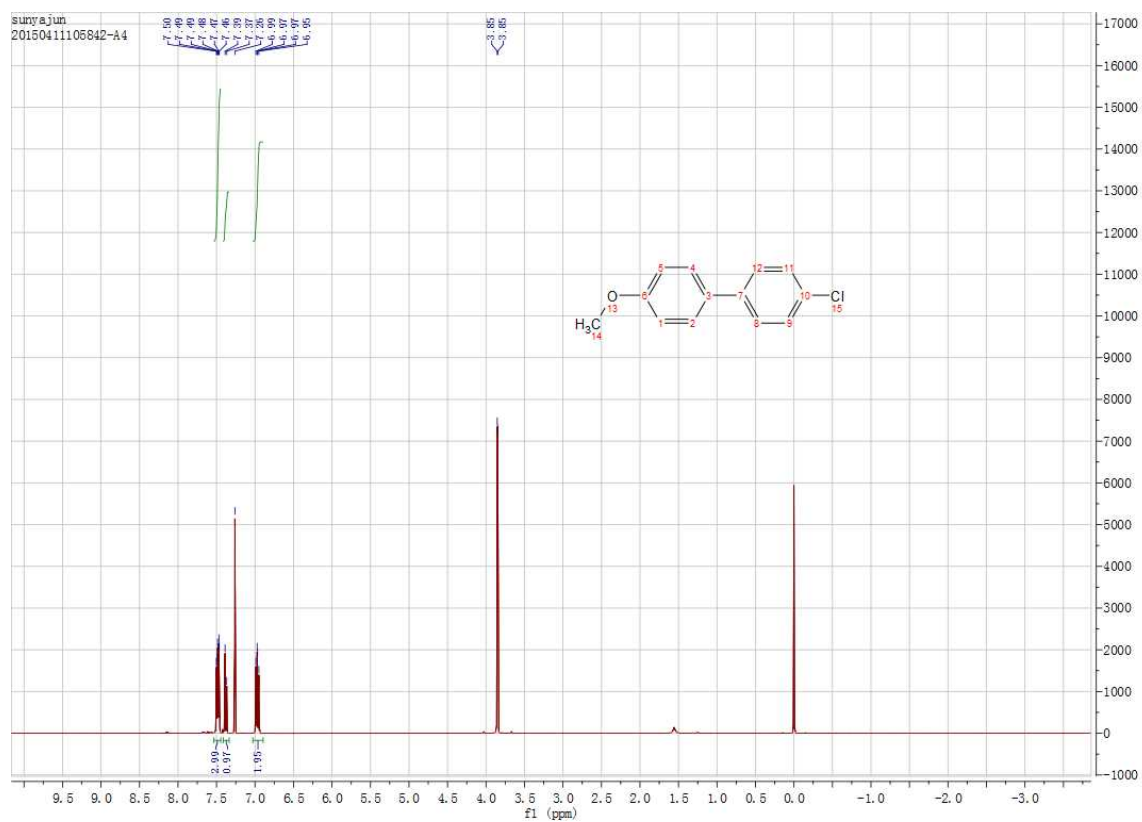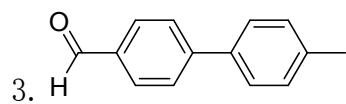

$^1\text{H NMR}$  (400 MHz,  $\text{CDCl}_3$ )  $\delta$  10.05 (s, 1H), 7.94 (d,  $J = 8.5$  Hz, 2H), 7.75 (d,  $J = 8.2$  Hz, 2H), 7.55 (d,  $J = 8.2$  Hz, 2H), 7.31 (s, 2H), 2.42 (s, 3H).



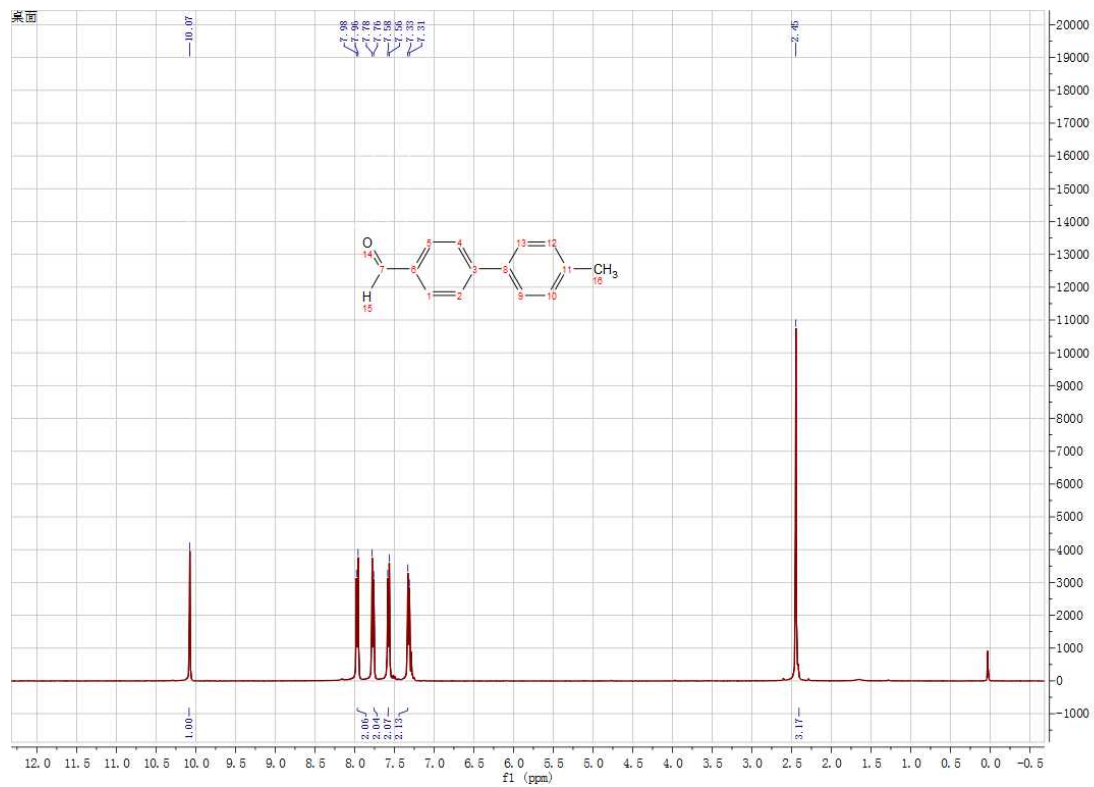

4.

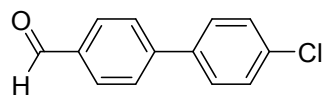

<sup>1</sup>H NMR (400 MHz, CDCl<sub>3</sub>) δ 10.08 (s, 1H), 7.98 (d, J = 8.5 Hz, 2H), 7.74 (d, J = 8.2 Hz, 2H), 7.59 (d, J = 8.7 Hz, 2H), 7.48 (d, J = 8.7 Hz, 2H), 3.92 – 1.13 (m, 1H).

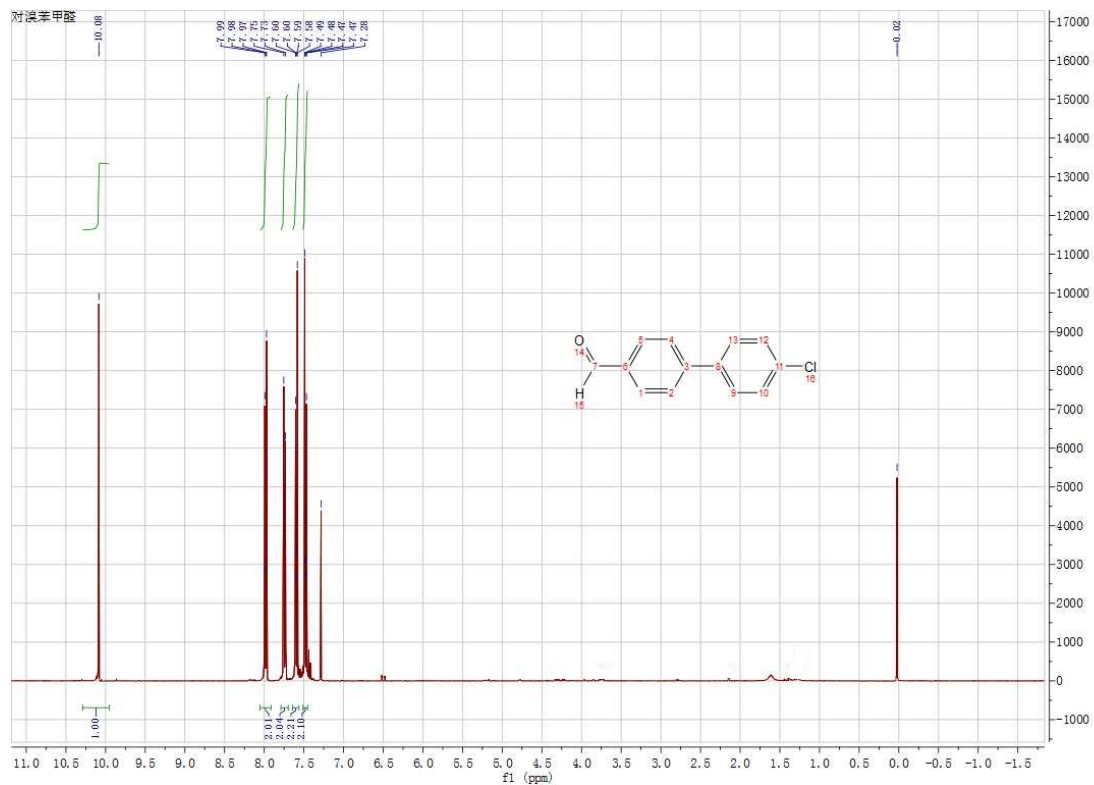

5,

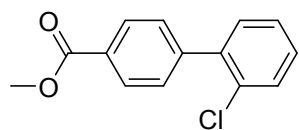

$^1\text{H NMR}$  (400 MHz,  $\text{CDCl}_3$ )  $\delta$  8.13 (d,  $J = 8.2$  Hz, 2H), 7.60 – 7.45 (m, 3H), 7.43 – 7.25 (m, 4H), 3.97 (s, 3H).

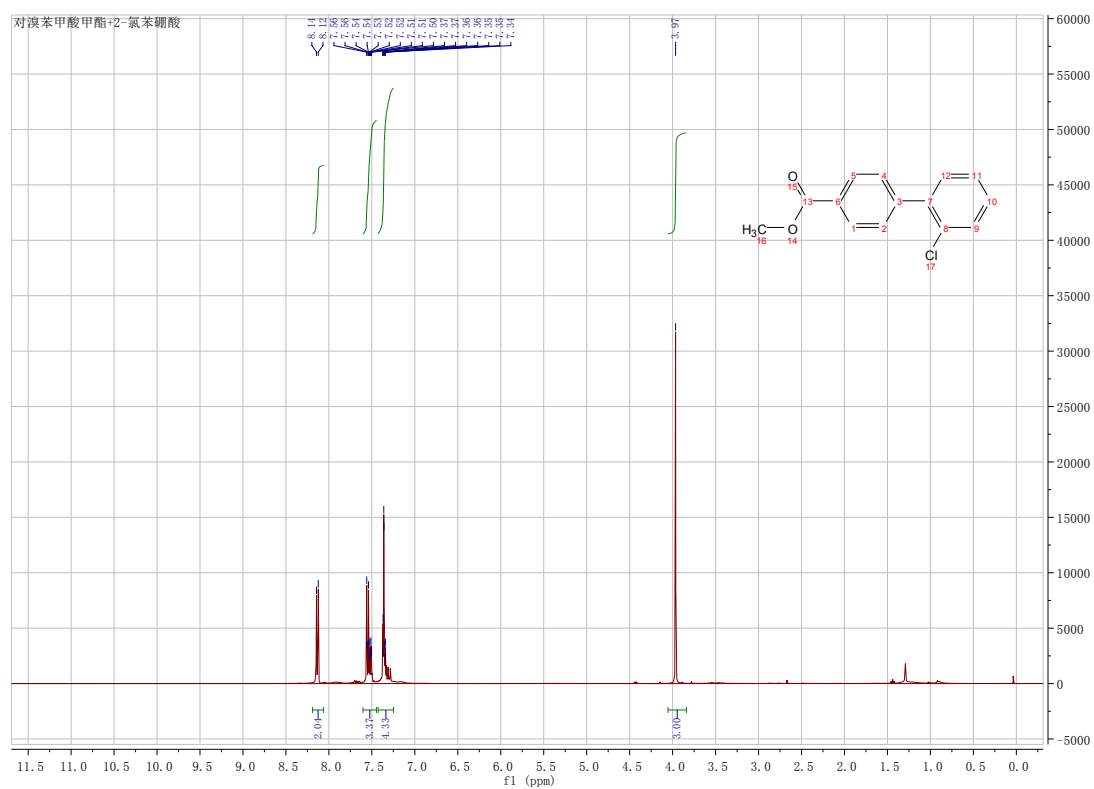

6.

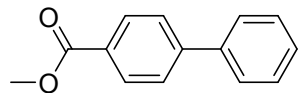

$^1\text{H NMR}$  (400 MHz,  $\text{CDCl}_3$ )  $\delta$  8.20 – 8.08 (m, 2H), 7.67 (ddd,  $J = 9.6, 7.4, 1.6$  Hz, 4H), 7.48 (ddd,  $J = 23.8, 15.2, 4.2$  Hz, 3H), 3.97 (s, 3H).

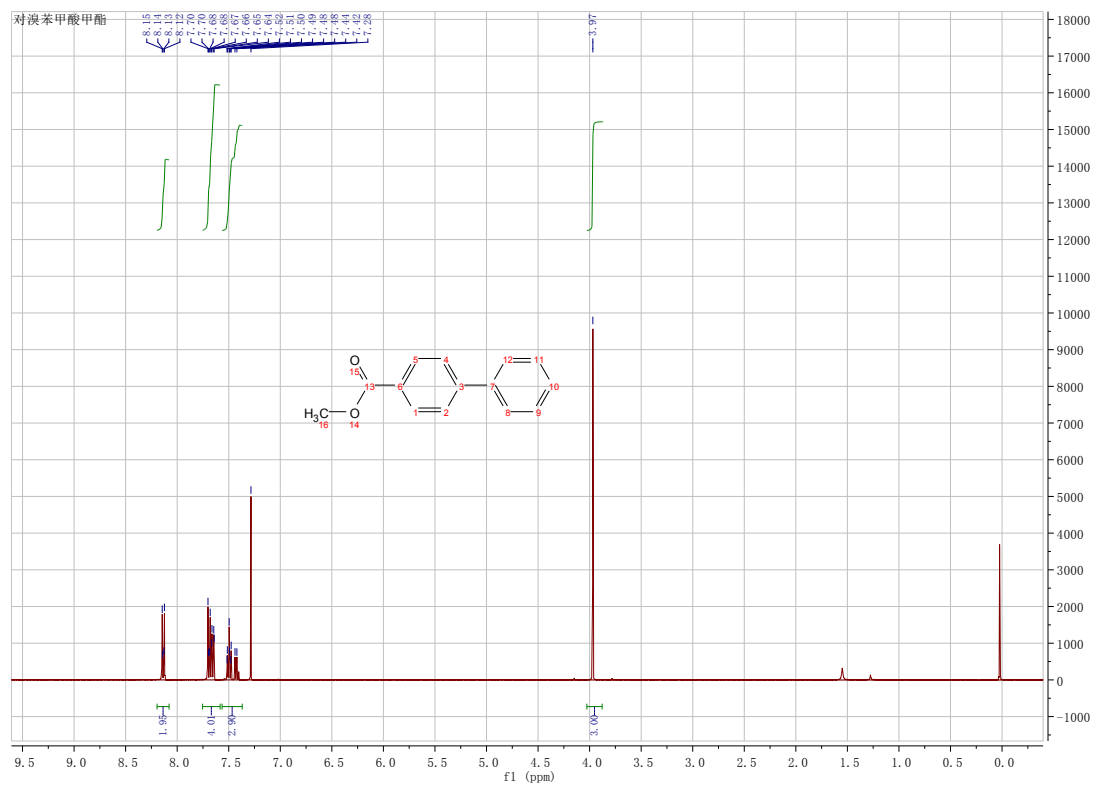

7.

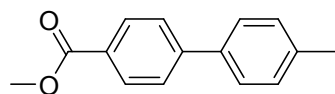

$^1\text{H NMR}$  (400 MHz,  $\text{CDCl}_3$ )  $\delta$  8.09 (d,  $J = 8.6$  Hz, 2H), 7.65 (d,  $J = 8.6$  Hz, 2H), 7.53 (d,  $J = 8.2$  Hz, 2H), 7.31 – 7.24 (m, 3H), 3.94 (s, 3H), 2.41 (s, 3H).

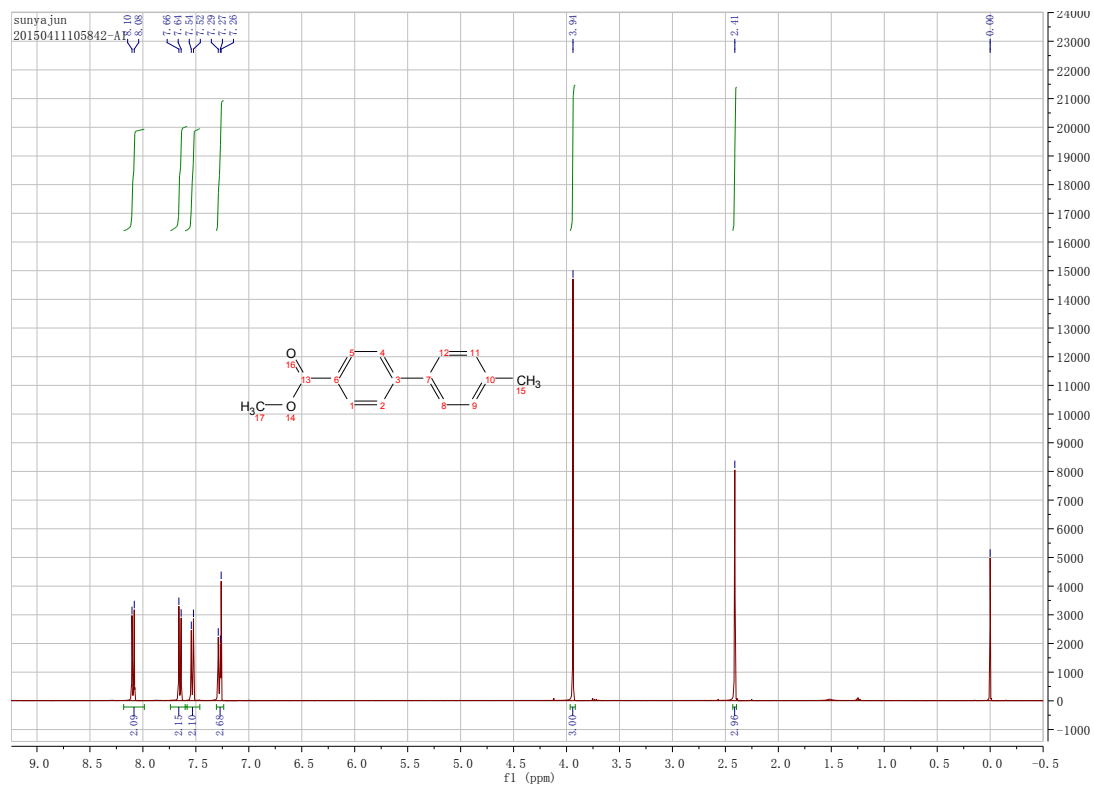

8.

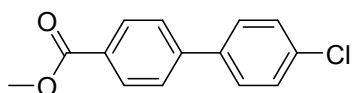

$^1\text{H NMR}$  (400 MHz,  $\text{CDCl}_3$ )  $\delta$  8.11 (d,  $J = 8.6$  Hz, 2H), 7.63 (d,  $J = 8.6$  Hz, 2H), 7.56 (d,  $J = 8.7$  Hz, 2H), 7.44 (d,  $J = 8.7$  Hz, 2H), 3.95 (s, 3H).

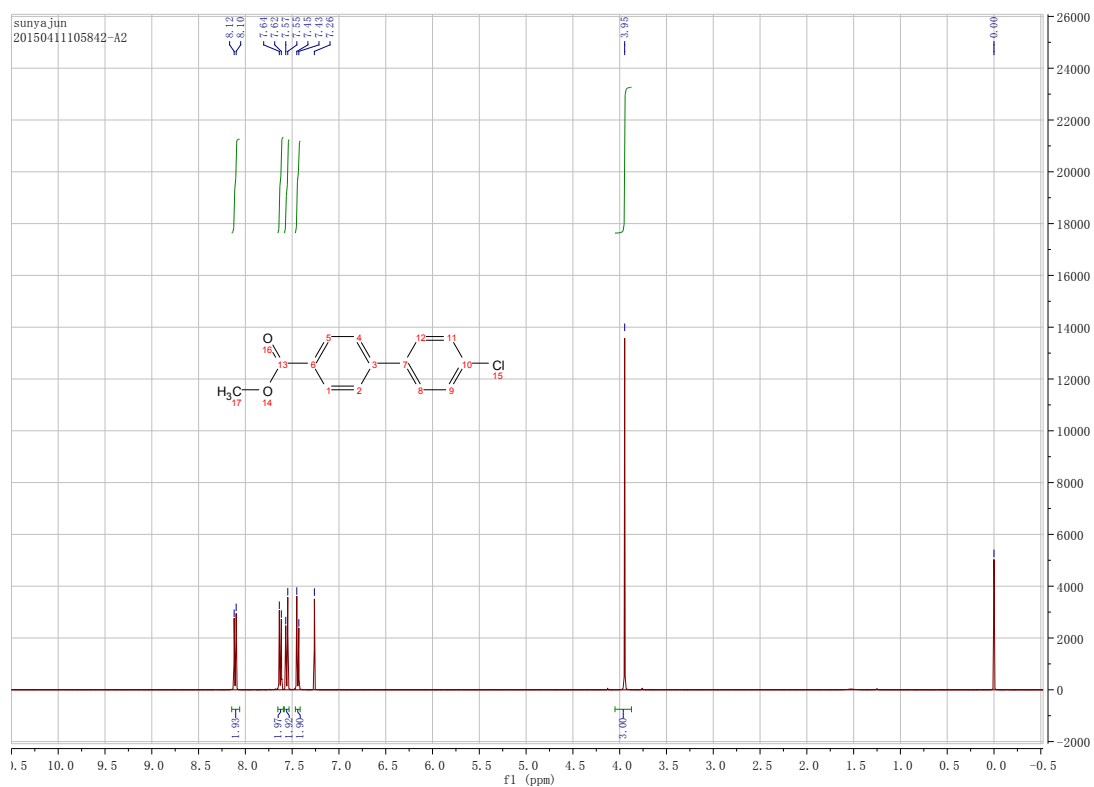

9.

$^1\text{H NMR}$  (400 MHz,  $\text{CDCl}_3$ )  $\delta$  8.06 (d,  $J = 8.6$  Hz, 2H), 7.58 (d,  $J = 8.6$  Hz, 2H), 7.54 – 7.48 (m, 1H), 7.40 – 7.31 (m, 3H), 2.68 (s, 3H).

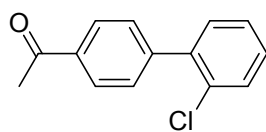

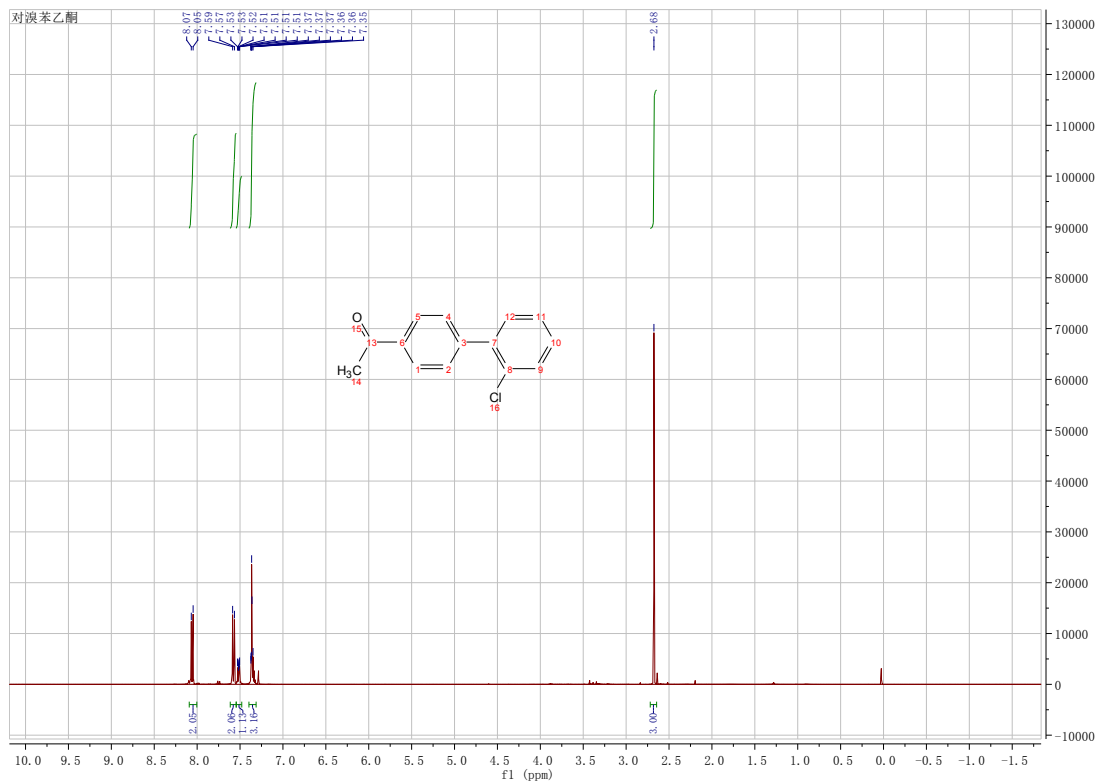

10

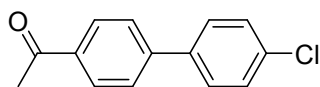

20150411105842-A6

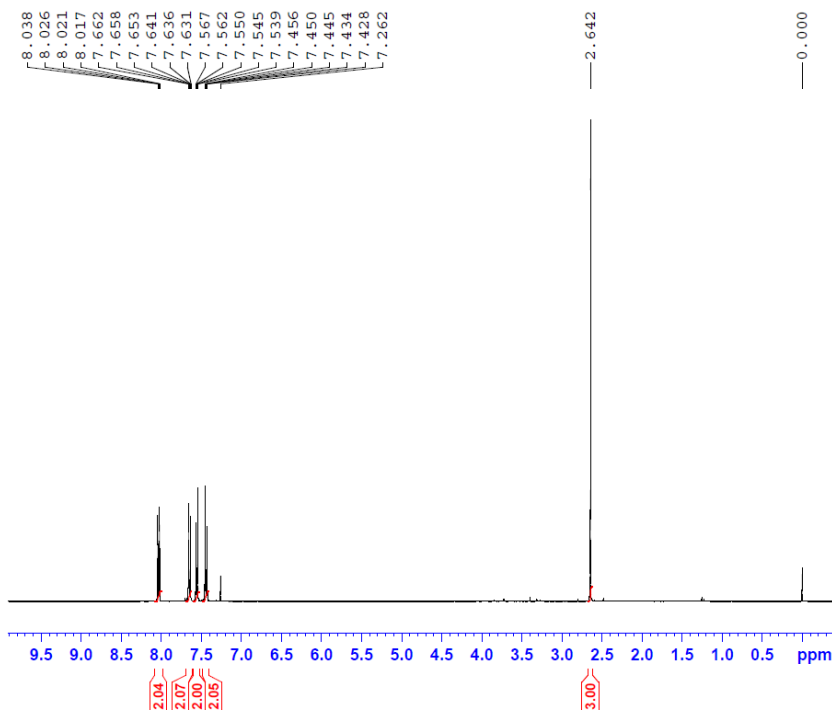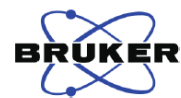

Current Data Parameters  
 NAME sunyajun  
 EXPNO 2015041208  
 PROCNO 1

F2 - Acquisition Parameters  
 Date\_ 20150412  
 Time 16.33  
 INSTRUM spect  
 PROBHD 5 mm PABBO BB/  
 PULPROG zg30  
 TD 65536  
 SOLVENT CDCl3  
 NS 16  
 DS 2  
 SWH 8012.820 Hz  
 FIDRES 0.122266 Hz  
 AQ 4.0894465 sec  
 RG 114  
 DW 62.400 usec  
 DE 6.50 usec  
 TE 291.6 K  
 D1 1.00000000 sec  
 TD0 1

===== CHANNEL f1 =====  
 SFO1 400.1324710 MHz  
 NUC1 1H  
 P1 14.90 usec  
 PLW1 11.00000000 W

F2 - Processing parameters  
 SI 65536  
 SF 400.1300091 MHz  
 WDW EM  
 SSB 0  
 LB 0.30 Hz  
 GB 0  
 PC 1.00

11.
